1 **Safety and Efficacy of Dupilumab for the Treatment of Hospitalized Patients with**  
2 **Moderate to Severe COVID 19: A Phase IIa Trial**

3  
4 Jennifer Sasson<sup>1</sup>, Alexandra N. Donlan<sup>1,2</sup>, Jennie Z. Ma<sup>3</sup>, Heather M. Haughey<sup>4</sup>, Rachael Coleman<sup>1</sup>, Uma  
5 Nayak<sup>5</sup>, Amy J. Mathers<sup>1,6</sup>, Sylvain Laverdure<sup>7</sup>, Robin Dewar<sup>8</sup>, Patrick E. H. Jackson<sup>1</sup>, Scott K. Heysell<sup>1</sup>,  
6 Jeffrey M. Sturek<sup>4</sup>, William A. Petri, Jr<sup>1,2,6\*</sup>

7  
8 <sup>1</sup>Division of Infectious Diseases and International Health, Department of Medicine, University of Virginia Health System,  
9 Charlottesville, VA, USA;

10 <sup>2</sup>Department of Microbiology, Immunology and Cancer Biology, University of Virginia School of Medicine, Charlottesville, VA, USA;

11 <sup>3</sup>Department of Public Health Sciences, University of Virginia School of Medicine, Charlottesville, Virginia, USA;

12 <sup>4</sup>Division of Pulmonary and Critical Care Medicine, Department of Medicine, University of Virginia Health System, Charlottesville,  
13 VA, USA;

14 <sup>5</sup>Center for Public Health Genomics and Department of Public Health Sciences, University of Virginia School of Medicine,  
15 Charlottesville, VA, USA;

16 <sup>6</sup>Department of Pathology, University of Virginia Health System, Charlottesville, VA, USA

17 <sup>7</sup>Laboratory of Human Retrovirology and Immunoinformatics, Frederick National Laboratory, Frederick, MD, USA

18 <sup>8</sup>Virus Isolation and Serology Laboratory, Frederick National Laboratory, Frederick, MD, USA

19 \*Corresponding author: William A. Petri Jr. University of Virginia, 345 Crispell Drive, Charlottesville Virginia 22908-1340, USA.

20 Email: wap3g@virginia.edu; Phone: 434.924.5621. ORCID ID 0000-0002-7268-1218

21 **ABSTRACT**

22 Background: A profound need remains to develop further therapeutics for treatment of those  
23 hospitalized with COVID-19. Based on data implicating the type 2 cytokine interleukin (IL)-13 as  
24 a significant factor leading to critical COVID-19, this trial was designed to assess dupilumab, a  
25 monoclonal antibody that blocks IL-13 and IL-4 signaling, for treatment of inpatients with  
26 COVID-19.

27 Methods: We conducted a phase IIa randomized double-blind placebo-controlled trial to assess  
28 the safety and efficacy of dupilumab plus standard of care versus placebo plus standard of care  
29 in mitigating respiratory failure and death in those hospitalized with COVID-19. Subjects were  
30 followed prospectively for 60 days. The primary endpoint was the proportion of patients alive  
31 and free of invasive mechanical ventilation at 28 days.

32 Findings: Forty eligible subjects were enrolled from June to November of 2021. There was no  
33 difference in adverse events nor in ventilator free survival at day 28 between study arms.  
34 However, for the secondary endpoint of mortality at day 60, subjects randomized to dupilumab  
35 had a higher survival rate compared to the placebo group (89.5% vs 76.2%, adjusted HR 0.05,  
36 95% CI: 0.0- 0.72, p=0.03). There were fewer subjects admitted to the ICU in the dupilumab  
37 group compared to placebo (33.3% vs 66.7%; adjusted HR 0.44, 95% CI: 0.09-2.09, p=0.30).  
38 Lastly, we saw downstream evidence of IL-4 and IL-13 signaling blockade in the dupilumab  
39 group through analysis of immune biomarkers over time.

40 Interpretation: Dupilumab was well tolerated and improved 60-day survival in patients  
41 hospitalized with moderate to severe COVID-19.

42 Trial Registration: This trial is registered with ClinicalTrials.gov, NCT04920916.

43 Funding: Virginia Biosciences Health Research Corporation, PBM C19, Henske Family  
44 Foundation, National Institutes of Health, National Cancer Institute

45 **INTRODUCTION:**

46 As in-hospital mortality remains at 10-26%<sup>1,2</sup> paired with the ongoing threats of new SARS-CoV-  
47 2 variants, there remains a substantial need for additional therapeutics for those hospitalized  
48 with COVID-19. Current therapies against both the virus and with intention for  
49 immunomodulation have demonstrated variable and/or modest benefit. For example, the  
50 RECOVERY trial showed a mortality reduction from 26% to only 23% with dexamethasone use  
51 in those hospitalized with COVID-19 respiratory failure, with the greatest mortality benefit seen  
52 in those requiring mechanical ventilation at randomization<sup>3</sup>. Clinical trials for remdesivir, an  
53 antiviral nucleoside analog, have produced variable results, with the ACTT-1 trial demonstrating  
54 a 5 day reduction in clinical recovery time in those on supplemental oxygen<sup>4</sup>. Randomized  
55 controlled trials investigating interleukin (IL)-6 inhibitors have shown conflicting results, with  
56 some indicating a mortality benefit in those within 24 hours of intensive care unit (ICU)  
57 admission and others showing no difference in clinical outcomes between study groups<sup>5,6</sup>.  
58 Janus kinase inhibitors initially showed only a 1 day improvement in clinical recovery time when  
59 combined with remdesivir, with later trials since showing reduced mortality from 13% to 8%  
60 when combined with usual care in those requiring hospitalization and at least 1 elevated  
61 inflammatory marker<sup>7,8</sup>. Findings from these studies suggest a need for improvement in  
62 treatment of those admitted with COVID-19 pneumonia.

63  
64 We have discovered that COVID-19 patients with high plasma IL-13 levels have a significantly  
65 greater risk of needing mechanical ventilation<sup>9</sup>. IL-13, which signals through the receptor IL-4R $\alpha$   
66 along with the closely related cytokine IL-4, is involved in eosinophilic inflammation, mucous  
67 secretion, goblet cell metaplasia and fibrosis, and has been regularly implicated in airway  
68 hyperresponsiveness and atopic disease<sup>10</sup>. We additionally found that neutralization of IL-13 in  
69 K18-hACE2 C57Bl/6J mice protected the animals from severe infection with SARS-CoV-2, as  
70 evidenced by reduced clinical score, weight loss and mortality<sup>9</sup>. The association of IL-13 along

71 with other effectors of type 2 immunity with respiratory failure from COVID-19 has also been  
72 demonstrated in other observation studies<sup>11,12</sup>. These findings established mechanistic and  
73 biologic plausibility for IL-13 as a driver of pulmonary injury in COVID-19.

74

75 There are medications available to block IL-13 signaling: dupilumab, an anti-IL-4R $\alpha$  monoclonal  
76 antibody, was approved for treatment of moderate to severe atopic dermatitis by the FDA in  
77 2017. It reduces clinical severity in patients with allergic diseases including atopic dermatitis,  
78 asthma and chronic rhinosinusitis<sup>13</sup>. The original clinical trials demonstrated minimal adverse  
79 events with dupilumab use, favoring it as a steroid sparing therapy in atopic disease<sup>14,15</sup>. Post  
80 hoc analysis of initial studies saw reduced incidence of respiratory viral infections with its use<sup>16</sup>.

81

82 Dupilumab use was associated with greater survival from COVID-19 in retrospective analysis:  
83 using the TriNetX international electronic medical record (EMR) database, we previously  
84 identified a cohort of 350,004 patients with COVID-19, of whom 81 had been prescribed  
85 dupilumab prior to their COVID-19 diagnosis<sup>9</sup>. Patients on dupilumab had a 12.3% absolute risk  
86 reduction in mortality compared to a propensity score matched sub cohort of 81 patients with  
87 COVID-19 not on dupilumab but with atopic diseases for which dupilumab is routinely used<sup>9</sup>.  
88 Dupilumab has since been shown to reduce symptom severity and improve clinical outcomes in  
89 other observational studies utilizing large patient databases<sup>17,18</sup>.

90

91 The association of IL-13 with COVID-19 respiratory failure, the demonstration of survival benefit  
92 with IL-13 blockade in a mouse model and the retrospective EMR analysis showing reduced  
93 COVID-19 mortality in those receiving dupilumab for atopic disease, provided significant  
94 evidence for further exploration of dupilumab use for treatment of COVID-19. This along with the  
95 safety of dupilumab and the potential for a targeted approach to therapy led to the design of a  
96 clinical trial to test its use in those hospitalized with COVID-19.

97

## 98 **METHODS**

### 99 **Design**

100 This was a randomized, double-blind, placebo-controlled trial designed to assess the safety and  
101 efficacy of dupilumab use in 40 hospitalized patients from a single center with moderate to  
102 severe COVID-19 infection. It was approved by the University of Virginia Institutional Review  
103 Board (IRB) in June 2021 (NCT04920916). Eligible subjects were enrolled and randomized at a  
104 1:1 ratio to receive either dupilumab or placebo, stratifying on disease severity measured by an  
105 oxygen requirement of  $\leq 15$  L/min or  $> 15$  L/min by nasal cannula. Included were those over the  
106 age of 18 who were hospitalized with a positive reverse transcription polymerase chain reaction  
107 test (RT-PCR) for SARS-CoV-2 within the last 14 days and evidence of moderate to severe  
108 COVID-19 as defined by National Institutes of Health (NIH) COVID-19 Severity Categorization<sup>19</sup>.  
109 Patients requiring mechanical ventilation at the time of enrollment were excluded. Both arms  
110 received standard of care management per current NIH COVID-19 treatment guidelines,  
111 including dexamethasone and remdesivir as deemed appropriate by their primary provider<sup>19</sup>.  
112 Subjects received a loading dose of dupilumab (600 mg, given as two 300 mg subcutaneous  
113 injections) or placebo on day 0 with additional maintenance doses of 300 mg or placebo given  
114 on days 14 and 28 if the subject remained hospitalized and receiving active care<sup>20</sup>. Subjects  
115 were followed prospectively for 60 days.

116

### 117 **Outcomes**

118 The primary outcome of the study was the proportion of patients alive and free of invasive  
119 mechanical ventilation at day 28. Safety outcomes were assessed via determination of the  
120 cumulative incidence of adverse events, including those previously reported to occur with  
121 dupilumab use (i.e., injection site reactions, eye/eyelid inflammation, conjunctivitis, herpes viral  
122 infection, eosinophilia)<sup>20</sup>. Additional clinical endpoints included all-cause mortality at day 28 and

123 60, proportion of patients alive and free of invasive mechanical ventilation at 60 days, hospital  
124 length of stay (LOS), ICU LOS, change in 8-point ordinal score and change in partial pressure of  
125 oxygen (PaO<sub>2</sub>) or oxygen saturation (SaO<sub>2</sub>) to fraction of inspired oxygen (FiO<sub>2</sub>) ratio. Plasma  
126 inflammatory markers, including C reactive protein (CRP), ferritin and a 47-plex cytokine panel  
127 were measured at various time points during the study. Additional type 2 inflammatory markers  
128 including TARC (CCL17), YKL40, eotaxin 3 (CCL26), arginase1 (Arg1), hyaluronan, soluble  
129 ST2 and total serum immunoglobulin E (IgE) were also measured. Ferritin, CRP and IgE levels  
130 were measured at the University of Virginia Clinical Laboratories while other biomarkers were  
131 measured by multiplex immunoassays or ELISAs depending on the analyte. SARS-CoV-2  
132 baseline nucleocapsid (N)- protein level was measured from day 0, 2, 5, 7 and 14 available  
133 plasma of each subject using a microbead-based immunoassay, a highly sensitive detection  
134 method described in previous studies<sup>21</sup>. Day 0 nasopharyngeal (NP) swabs obtained for  
135 assessment of SARS-CoV-2 RNA positivity via RT-PCR underwent genomic sequencing to  
136 determine the SARS-CoV-2 lineage for samples with sufficient RNA using ARTIC v3 primers on  
137 either MiSeq (Illumina) or MinIon (Oxford Nanopore) using the and categorized according to  
138 PANGOLIN and World Health Organization<sup>22,23</sup>.

139

#### 140 **Statistical Analysis**

141 COVID-19 hospitalization data from UVA between March 2020 and April 2021 showed that  
142 79.5% of COVID-19 inpatients were alive and free of mechanical ventilation at 28 days under  
143 usual care. With a pre-selected sample size of 40 patients and alpha=0.1 (one sided), we would  
144 be able to detect a difference of 17.7% in the proportion of subjects alive and free of mechanical  
145 ventilation at 28 days with 75% power.

146

147 Primary and secondary outcomes were analyzed under the intention-to-treat (ITT) principle.

148 Safety outcomes were analyzed in the as treated population, including subjects who were

149 enrolled and received at least one dose of study drug. Demographics, clinical and safety  
150 outcomes were analyzed initially with the Chi-square or Fisher's exact tests for categorical  
151 measures and two-sample t-test or Wilcoxon rank sum for continuous measures, after  
152 assessment of normality. Treatment differences in ventilator free survival proportions were  
153 analyzed via logistic regression. Mortality differences were evaluated by the log-rank test and  
154 further in the Cox regression for time to death outcome. Baseline patient characteristics and  
155 known risk factors for severe disease in COVID-19, including age, sex, body mass index (BMI),  
156 comorbidities and COVID-19 vaccination status, were adjusted in regression models if initial  
157 analyses discovered imbalance in group characteristics<sup>24</sup>. Differences in the biomarkers  
158 between treatment groups were analyzed exploratively by t-test or Wilcoxon rank sum testing at  
159 each time point.

160

161 As an exploratory analysis, we included mechanical ventilation as a time varying variable in the  
162 Cox regression for further investigation of its influence on survivability. This allowed us to  
163 account for the significant change in mortality risk between pre- and post-intubation when a  
164 patient was placed on mechanical ventilation. We additionally tested differences in the likelihood  
165 of ICU admission between the two groups by the log-rank test. Lastly, after assessment of  
166 normality, N-protein levels were split into quartiles and analyzed by treatment group for  
167 influence on mortality via log-rank test and Cox regression. Regression models were adjusted  
168 for additional medications that were most likely to influence viral load, including monoclonal  
169 antibodies and remdesivir. Longitudinal N- protein levels over the first fourteen study days were  
170 evaluated by the treatment groups using the linear mixed effects models to account for within-  
171 subject correlations.

172

## 173 **RESULTS**

### 174 **Patient and Virus Characteristics**

175 Forty patients were enrolled from June 23, 2021 through November 11, 2021 (Fig S1). The  
176 groups were well matched with regard to age, BMI, race, ethnicity, comorbidities, vaccination  
177 status and days from COVID-19 symptom onset to enrollment (Table 1). Patients in the placebo  
178 arm were more likely to be male compared to the dupilumab arm (76.2% vs. 36.8%). There  
179 were no significant differences in non-study COVID-19 therapies received between the  
180 treatment groups (Table 1). Of those NP samples available for SARS-CoV-2 sequencing, 30 of  
181 31 (96.8%) subjects had the delta variant and one subject in the placebo group had the iota  
182 variant (Table S1).  
183



|                                            | Placebo (n=21) | Dupilumab (n=19) |
|--------------------------------------------|----------------|------------------|
| Age                                        | 63.0 (23.0)    | 69 (26.0)        |
| Sex                                        |                |                  |
| Male                                       | 16 (76.2%)     | 7 (36.8%)        |
| BMI                                        | 32.3 (10.1)    | 33.6 (14.9)      |
| Ethnicity                                  |                |                  |
| Hispanic                                   | 3 (14.3%)      | 3 (15.8%)        |
| Race                                       |                |                  |
| White                                      | 14 (66.7%)     | 13 (68.4%)       |
| Black                                      | 6 (28.6%)      | 4 (21.1%)        |
| Asian                                      | 0 (0.0%)       | 1 (5.3%)         |
| Other                                      | 1 (4.8%)       | 1 (5.3%)         |
| Comorbidities                              |                |                  |
| Obesity                                    | 15 (71.4%)     | 14 (73.7%)       |
| Chronic Kidney Disease                     | 7 (33.3%)      | 3 (15.8%)        |
| Asthma                                     | 4 (19.1%)      | 4 (21.1%)        |
| Respiratory Disease (COPD, emphysema)      | 3 (14.3%)      | 2 (10.5%)        |
| Diabetes                                   | 8 (38.1%)      | 7 (36.8%)        |
| Coronary Artery Disease                    | 6 (28.6%)      | 3 (15.8%)        |
| Cardiac Valvular Disease                   | 3 (14.3%)      | 2 (10.5%)        |
| Hypertension                               | 10 (47.6%)     | 8 (42.1%)        |
| Congestive Heart Failure                   | 5 (23.8%)      | 2 (10.5%)        |
| Cardiac Arrhythmia                         | 4 (19.1%)      | 1 (5.3%)         |
| Depression or psychotic disorder           | 3 (14.3%)      | 8 (42.1%)        |
| Malignancy                                 | 4 (19.1%)      | 3 (15.8%)        |
| Autoimmune disease                         | 2 (9.5%)       | 2 (10.5%)        |
| Organ or stem cell transplant recipient    | 3 (14.3%)      | 1 (5.3%)         |
| Other immune deficiency                    | 1 (4.8%)       | 0 (0.0%)         |
| Smoking History                            |                |                  |
| Never                                      | 12 (57.1%)     | 15 (79.0%)       |
| Current                                    | 3 (14.3%)      | 0 (0.0%)         |
| Past                                       | 6 (28.6%)      | 4 (21.1%)        |
| Days from symptom onset to study treatment | 8.0 (4.0)      | 7.0 (5.0)        |
| Received COVID-19 vaccine                  |                |                  |
| Moderna                                    | 4 (19.1%)      | 1 (5.3%)         |
| Pfizer                                     | 5 (23.8%)      | 4 (21.1%)        |
| J&J                                        | 0 (0.0%)       | 2 (10.5%)        |
| None                                       | 12 (57.1%)     | 12 (63.2%)       |
| Other COVID-19 therapeutics received       |                |                  |
| Steroids                                   | 20 (95.2%)     | 19 (100%)        |
| Remdesivir                                 | 10 (47.6%)     | 16 (84.2%)       |
| IL-6 inhibitor                             | 0 (0.0%)       | 0 (0.0%)         |
| Janus kinase inhibitor                     | 4 (19.1%)      | 1 (5.3%)         |
| Monoclonal antibodies                      | 3 (14.3%)      | 2 (10.5%)        |

**Table 1:** Patient characteristics. Continuous variables expressed as median (interquartile range). Categorical variables expressed as total n (percentage). Age expressed in years. Body Mass Index (BMI, kg/m<sup>2</sup>), Chronic Obstructive Pulmonary Disease (COPD), Johnson and Johnson (J&J).

185 **Safety**

186 There were no significant differences in cumulative adverse events observed between the  
187 treatment groups (Table 2). In the dupilumab group, five subjects developed asymptomatic  
188 eosinophilia compared to one subject in the placebo group (Fisher's exact p=0.09). There were  
189 no clinical consequences, including dermatologic, gastrointestinal, pulmonary, cardiac or  
190 neurologic, attributed to the peripheral eosinophilia seen in these subjects.

|                             | Placebo (n=21) | Dupilumab (n=19) |
|-----------------------------|----------------|------------------|
| Injection site reactions    | 0 (0.0%)       | 0 (0.0%)         |
| Conjunctivitis              | 2 (9.5%)       | 0 (0.0%)         |
| Bacterial pneumonia         | 1 (4.8%)       | 2 (10.5%)        |
| Herpes viral infection      | 0 (0.0%)       | 0 (0.0%)         |
| Eosinophilia*               | 1 (4.8%)       | 5 (26.3%)        |
| Hyper eosinophilic syndrome | 0 (0.0%)       | 0 (0.0%)         |
| Other infections            | 2 (9.5%)       | 4 (21.1%)        |
| Cumulative                  | 6              | 11               |

191 **Table 2:** Adverse events observed throughout the study period by treatment group. Other  
192 infections included *Clostridioides difficile* infection (1), bacteremia (2), urinary tract  
193 infections (2) and oral candidiasis (1). Categorical variables expressed as total n  
194 (percentage). Eosinophilia was defined as an absolute eosinophil count >0.6 k/uL at  $\geq 1$   
measurement throughout the study period. \*Difference between treatment groups was not  
statistically significant with Fischer's exact p=0.09.

195 **Clinical Efficacy**

196 There was no significant difference in the primary endpoint of proportion of patients alive and  
197 free of mechanical ventilation at day 28 between the two groups (Table 3). However, by  
198 secondary endpoint at 60 days, 89.5% of subjects in the dupilumab group were alive compared  
199 to 76.2% for the placebo group as no patients remained on mechanical ventilation by day 60 in  
200 either group (Table 3). After adjustment for sex and mechanical ventilation as a time varying  
201 predictor, the risk of death over 60-day follow-up period was significantly lower in dupilumab  
202 group compared to placebo (Table 3; Fig 1).

203

204

|                                                                           | Placebo (n=21) | Dupilumab (n=19) | OR (95% CI) or HR (95% CI)       | P value |
|---------------------------------------------------------------------------|----------------|------------------|----------------------------------|---------|
| Proportion of patients alive and free of mechanical ventilation by day 28 | 18 (85.7%)     | 15 (78.9%)       | Unadjusted OR: 1.60 (0.31, 8.30) | 0.57    |
|                                                                           |                |                  | Adjusted OR: 2.45 (0.40, 15.10)  | 0.34    |
| Proportion of patients alive and free of mechanical ventilation by day 60 | 16 (76.2%)     | 17 (89.5%)       | Unadjusted OR: 0.38 (0.06, 2.22) | 0.28    |
|                                                                           |                |                  | Adjusted OR: 0.44 (0.07, 2.96)   | 0.40    |
| Mortality by day 28                                                       | 3 (14.3%)      | 1 (5.3%)         | Unadjusted HR: 0.35 (0.04, 3.32) | 0.36    |
|                                                                           |                |                  | Adjusted HR: 0.06 (0.003, 1.59)  | 0.09    |
| Mortality by day 60                                                       | 5 (23.8%)      | 2 (10.5%)        | Unadjusted HR: 0.40 (0.08, 2.05) | 0.27    |
|                                                                           |                |                  | Adjusted HR: 0.05 (0.004, 0.72)  | 0.03    |

205 **Table 3:** Primary and key secondary endpoints by treatment group. Primary endpoint was ventilator free survival by  
 206 day 28. Secondary endpoints were ventilator free survival by day 60, mortality by day 60 and mortality by day 28.  
 207 Proportions are listed as total n (%). The differences in the ventilator free survival proportions were evaluated using  
 208 logistic regression, adjusted for sex. The differences in mortality risk were evaluated in the Cox regression, adjusted  
 209 for sex and time varying mechanical ventilation.

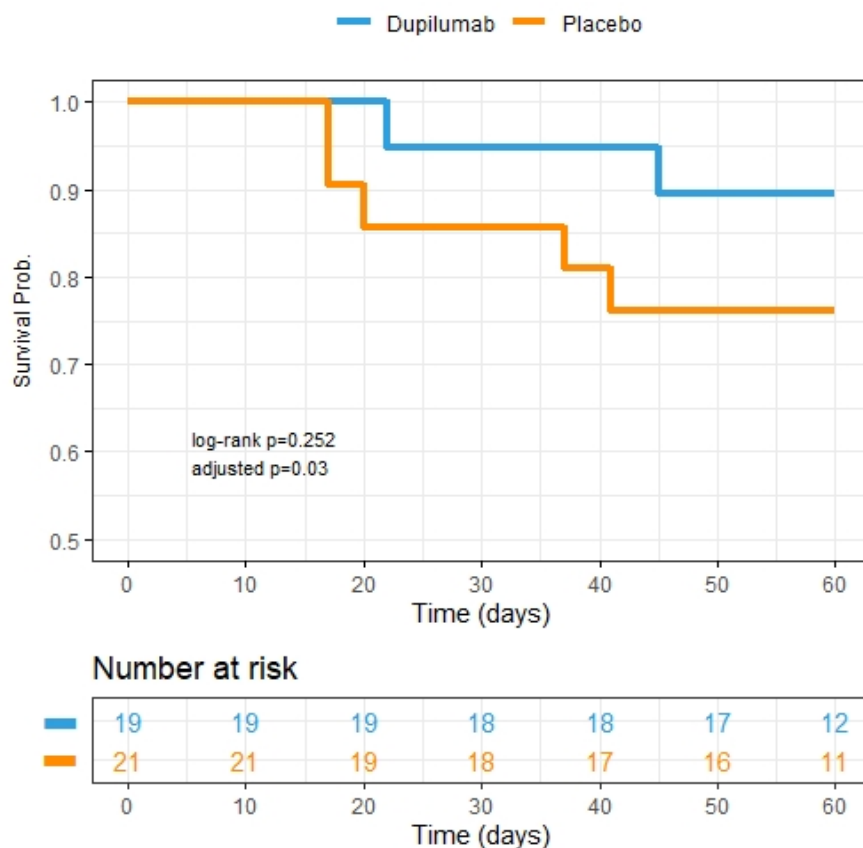

208 **Figure 1:** Kaplan Meier survival curves depicting 60-day mortality between two  
 209 treatment groups. Dupilumab group is represented by blue line. Placebo group  
 210 is represented by the orange line. Adjusted p value indicative of adjustment for  
 211 sex and time varying ventilation in the Cox regression. Patient study visits  
 212 occurred within an allotted range of exact study days and therefore the number  
 at risk in the table is representative of patient data availability up until those  
 exact days (i.e., if study visit was conducted on day 59 and no event had  
 occurred, then the subject was included in the at-risk pool up until day 59 but  
 not in that for day 60).

213 Numerically fewer subjects in the dupilumab group required ICU care (33.3%) compared to the  
 214 placebo group (66.7%) though this difference was not statistically significant (log-rank  $p=0.23$ ,  
 215 HR 0.44, CI: 0.09-2.09,  $p=0.30$  adjusted for sex, Fig 2). There was no difference in additional  
 216 secondary endpoints between the two treatment groups (Table 4, Fig S2, Fig S3).

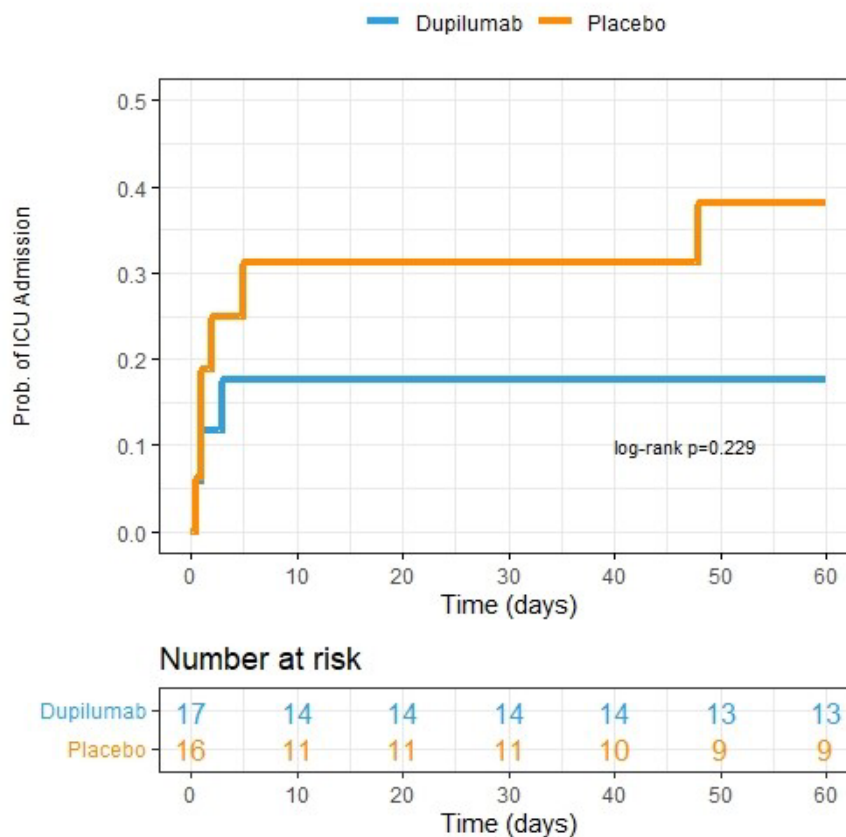

217 **Figure 2:** Kaplan Meier curve depicting need for escalation to ICU over 60-  
 218 day study period. Patients already admitted to the ICU on day of enrollment  
 219 ( $n=7$ ) were excluded from analysis. Dupilumab group is represented by  
 220 blue line. Placebo group is represented by the orange line. Patient study  
 221 visits occurred within an allotted range of exact study days and therefore  
 the number at risk in the table is representative of patient data availability  
 up until those exact days (i.e., if study visit was conducted on day 59 and  
 no event had occurred, then the subject was included in the at-risk pool up  
 until day 59 but not in that for day 60).

## 222 **Biomarker Analysis**

223 In both treatment groups, CRP, ferritin and IgE levels declined in the first two weeks with no  
 224 significant difference in the change in measures from day 0 to 14 between groups (Fig S4).

225 When looking at the change in absolute cell counts over time, there was an increase in

226 eosinophils by day 14 in the dupilumab group compared to the placebo group ( $p=0.01$  by  
227 Wilcoxon rank sum, Fig S5). Analysis of patient cytokine, chemokine and growth factors in  
228 serum at various study time points showed a decreased monocyte chemoattractant protein-1  
229 (MCP-1) at day 7 in the dupilumab treatment group compared to placebo ( $p=0.04$  by Wilcoxon  
230 rank sum, Fig S6). By day 14, there was a larger decrease in eotaxin-3 levels in the dupilumab  
231 group compared to the placebo ( $p=0.08$  by Wilcoxon rank sum, Fig S6). Additionally, there was  
232 a trend towards decreased levels of YKL40 in the dupilumab group compared to the placebo by  
233 day 14 ( $p=0.26$  by Wilcoxon rank sum, Fig S6). There was no statistically significant difference  
234 in baseline N-protein levels in the dupilumab group (median 671 ng/mL) compared to the  
235 placebo group (median 580 ng/mL;  $p=0.75$  by Wilcoxon rank sum). When comparing the top  
236 quartile vs. the bottom three quartiles (i.e., bottom 75<sup>th</sup> percentile) of baseline N-protein level  
237 within each treatment group, we found significant survival difference among the four groups  
238 (log-rank  $p=0.022$ , Fig S7). The 60-day mortality risk for those in the top quartile of baseline N-  
239 protein was 3.8 times of those in the bottom three quartiles after adjusting for treatment group,  
240 remdesivir use and monoclonal antibody use (95% CI: 0.78-18.7,  $p=0.098$ ). N-protein levels in  
241 log-scale declined significantly from baseline to day 14 levels ( $p<0.0001$ ), however, no  
242 difference was found in the rate of decline between the two treatment groups ( $p=0.17$ ).

243

## 244 **DISCUSSION**

245 In this randomized double-blind placebo-controlled trial, although there was no difference  
246 between study groups regarding the primary endpoint of 28-day ventilator free survival, the  
247 secondary endpoint of increased 60-day survival in the dupilumab group was achieved.

248 Additionally, there were no safety signals seen with dupilumab use.

249

250 Although most deaths occurred in the placebo arm (5) compared to dupilumab (2), the overall  
251 mortality of subjects enrolled in this study (17.5%) was higher than expected, suggesting

252 enrollment of a population with relatively higher disease severity. ICU mortality was 20% in the  
253 dupilumab group versus 36% in placebo, and ventilator mortality was 50% in the dupilumab  
254 group compared to 100% in placebo. Severity of illness seen in our study reflected that  
255 enrollment occurred during the delta surge and that the majority of those enrolled were  
256 unvaccinated, consistent with national data at the time<sup>25</sup>. For example, the National Hospital  
257 Care Survey (NHCS) data from the US Centers for Disease Control and Prevention (CDC),  
258 showed 11.9-13.1% in-hospital mortality in select hospitals throughout the United States during  
259 the month of August 2021 with ventilatory mortality rates ranging from 47.9%-74.1%, a time  
260 period during which this study enrolled subjects<sup>26</sup>. Furthermore, baseline N-protein levels were  
261 the same between the two groups and comparable to baseline N-protein levels of patients  
262 enrolled in the ACTIV3 trials<sup>27</sup>. As high N-protein levels are predictive of COVID-19 disease  
263 progression, a finding also demonstrated in this study, this suggests patients enrolled in our  
264 study were of comparable baseline disease severity<sup>27</sup>.

265  
266 The detection of survival and mechanical ventilation differences at 60 days rather than at 28  
267 days is consistent with reports of immunologic dysfunction from COVID-19 extending out to 8  
268 months for mild to moderate COVID-19, with deaths from severe COVID-19 occurring out to 12  
269 months<sup>28,29</sup>. Although the small size of our study limits broad conclusions about the mortality  
270 benefit of dupilumab, these findings combined support a late clinical benefit of blockade of a  
271 type 2 immune process in COVID-19. The response to dupilumab in asthma is also protracted  
272 with improvements in FEV1 first being observed 2 weeks after initiation of treatment<sup>30</sup>. Thus, the  
273 time to clinical effect of dupilumab in the acute COVID-19 setting may have limited our ability to  
274 see early clinical differences between the treatment groups. For example, subjects in our study  
275 who ultimately required mechanical ventilation did so within the first 8 days of the study, some  
276 within 1-2 days of enrollment, during a time in which drug concentration may have been lower,  
277 particularly in the context of a rapidly evolving clinical process.

278

279 Although biomarker trends seen in both groups were likely influenced by the steroids that almost  
280 all subjects received, we did see a reduction of the Type 2 immune markers YKL40 and eotaxin-  
281 3 in the dupilumab arm when compared to the placebo arm, indicative of the IL-4R $\alpha$  blockade  
282 with inhibition of downstream mediators of the type 2 immune response. Increased peripheral  
283 eosinophil counts in the dupilumab group occurred by day 14, consistent with previous  
284 observations of dupilumab use in patients with atopic disease, likely due to decreased  
285 eosinophil uptake in tissue<sup>30,31</sup>. While we did not see IgE decrease at 2 weeks of dupilumab  
286 treatment, this is consistent with prior studies showing gradual decline of IgE levels compared to  
287 other biomarkers after dupilumab initiation<sup>31</sup>. We also saw reduction in MCP-1, a potent  
288 chemoattractant molecule of monocytes/macrophages, in the dupilumab group, high levels of  
289 which have been associated with COVID-19 disease severity<sup>32,33</sup>. Lastly, although recent invitro  
290 studies have shown that high IL-13 levels are associated with reduction in ACE2 receptor  
291 expression and decreased SARS-CoV-2 viral load, this is inconsistent with our study which  
292 shows similar rates of decline in N-protein levels in those who received IL-4R $\alpha$  blockade  
293 compared to placebo<sup>34</sup>.

294

295 The study had several limitations. These included the lack of achievement of the primary  
296 endpoint of proportion of patients alive and free of mechanical ventilation at day 28, and the  
297 wide confidence intervals in the survival benefit of dupilumab at day 60. Additional limitations  
298 included unequal gender distribution between groups, patients were almost exclusively infected  
299 by the Delta variant of SARS CoV-2 and a higher-than-expected overall mortality rate.

300

301 The study also had several notable strengths including having as a foundation the preclinical  
302 data on the mechanism of disease exacerbation by IL-13 in COVID-19, originality in the study of  
303 type 2 immune inhibition, the use of a prospective placebo-controlled randomized and double-

304 blind design, and demonstration of the safety of dupilumab. Importantly, there was evidence for  
305 mortality reduction and reduced ICU escalation with dupilumab use as we had predicted from  
306 animal models and retrospective human studies, despite sample size limitations. In light of the  
307 ongoing need for additional therapies for COVID-19 associated respiratory failure and the  
308 modest clinical benefits seen with other anti-viral and immunotherapies currently being used,  
309 the results of this study advance dupilumab as a promising treatment option for those  
310 hospitalized with COVID-19.

311

312 **COMPETING INTERESTS STATEMENT:** The authors have no competing interests to report.

313

314 **ACKNOWLEDGEMENTS:** We wish to thank the patients who consented to enroll in this study  
315 in an effort to help others with COVID-19 and the nursing staff and providers on the COVID-19  
316 units for their assistance with the trial. We thank Jennifer White for IRB protocol preparation,  
317 Amy Warren and Lori Elder for IRB protocol preparation and IND preparation/submission and  
318 the staff at the investigational drug pharmacy at UVA. We'd also like to thank Mary Young and  
319 William Petri and the Biorepository and Tissue Research Facility at UVA who collected,  
320 organized and analyzed research samples. Lastly, we'd like to thank Helene Highbarger,  
321 Perrine Lallemand and Jeroen Highbarger of the Virus Isolation and Serology Laboratory,  
322 Frederick National Laboratory (FNL), and Ashley McCormack of Laboratory of Human  
323 Retrovirology and Immunoinformatics, FNL for their technical support on the nucleocapsid  
324 protein project.

325

326 **FUNDING STATEMENT:** This work is supported by grants from the Virginia Biosciences Health  
327 Research Corporation, by PBM C19, the Henske Family Foundation, and NIH grants R01  
328 AI124214, T32 AI007496 (AD), T32 DK072922/ TL1 DK132771 (JS), UL1TR003015  
329 and KL2TR003016 (JMS and JZM). The nucleocapsid protein project has been funded in whole



330 or in part with federal funds from the National Cancer Institute, National Institutes of Health,  
331 under Contract No. 75N91019D00024. The content of this publication does not necessarily  
332 reflect the views or policies of the Department of Health and Human Services, nor does mention  
333 of trade names, commercial products, or organizations imply endorsement by the U.S.  
334 Government.

335

336 **ROLE OF FUNDING SOURCE:** The funding sources listed had no role in the design,  
337 implementation, analyses or manuscript writing.

338

339 **AUTHORS CONTRIBUTIONS:** JS, AND and WAP contributed in funding acquisition; AND, JS,  
340 JZM and WAP contributed in conceptualization and methodology; HMH, RC, JS and WAP  
341 contributed in screening, enrollment and consent process; RC, HMH, UN, JS and WAP  
342 contributed to data collection and documentation; UN, RC, HMH and JS contributed in database  
343 management; HMH, RC, JS and WAP contributed in project administration and coordination;  
344 JZM, AND, JS and WAP contributed in data analysis and visualization; JS contributed in writing  
345 of original draft; all authors contributed in data interpretation, review and editing; WAP  
346 contributed in supervision; AJM contributed in organization and collection of viral sequencing  
347 data; SL and RD contributed in methodology, conceptualization, organization and collection of  
348 nucleocapsid protein data.

349

350 **ETHICS APPROVAL:** Study approval was obtained through the Institutional Board Review at  
351 the University of Virginia and through the Food and Drug Administration (FDA) Investigational  
352 New Drug application.

353

#### 354 **WORKS CITED**

355 1. Macedo A, Gonçalves N, Febra C. COVID-19 fatality rates in hospitalized patients:

- 356 systematic review and meta-analysis. *Ann Epidemiol.* 2021;57:14-21.  
357 doi:10.1016/j.annepidem.2021.02.012
- 358 2. Gray WK, Navaratnam A V, Day J, et al. Variability in COVID-19 in-hospital mortality  
359 rates between national health service trusts and regions in England: A national  
360 observational study for the Getting It Right First Time Programme. *EClinicalMedicine.*  
361 2021;35:100859. doi:10.1016/j.eclinm.2021.100859
- 362 3. Dexamethasone in Hospitalized Patients with Covid-19. *N Engl J Med.* 2021;384(8):693-  
363 704. doi:10.1056/NEJMoa2021436
- 364 4. Beigel JH, Tomashek KM, Dodd LE, et al. Remdesivir for the Treatment of Covid-19 —  
365 Final Report. *N Engl J Med.* 2020;383(19):1813-1826. doi:10.1056/NEJMoa2007764
- 366 5. Rosas IO, Bräu N, Waters M, et al. Tocilizumab in Hospitalized Patients with Severe  
367 Covid-19 Pneumonia. *N Engl J Med.* 2021;384(16):1503-1516.  
368 doi:10.1056/NEJMoa2028700
- 369 6. Interleukin-6 Receptor Antagonists in Critically Ill Patients with Covid-19. *N Engl J Med.*  
370 2021;384(16):1491-1502. doi:10.1056/NEJMoa2100433
- 371 7. Kalil AC, Patterson TF, Mehta AK, et al. Baricitinib plus Remdesivir for Hospitalized  
372 Adults with Covid-19. *N Engl J Med.* 2021;384(9):795-807. doi:10.1056/nejmoa2031994
- 373 8. Marconi VC, Ramanan A V, de Bono S, et al. Efficacy and safety of baricitinib for the  
374 treatment of hospitalised adults with COVID-19 (COV-BARRIER): a randomised, double-  
375 blind, parallel-group, placebo-controlled phase 3 trial. *Lancet Respir Med.* 2021;19(21):1-  
376 12. doi:10.1016/s2213-2600(21)00331-3
- 377 9. Donlan AN, Sutherland TE, Marie C, et al. IL-13 is a driver of COVID-19 severity. *JCI*  
378 *Insight.* 2021;6(15). doi:10.1172/jci.insight.150107
- 379 10. Wynn TA. IL-13 effector functions. *Annu Rev Immunol.* 2003;21:425-456.  
380 doi:10.1146/annurev.immunol.21.120601.141142
- 381 11. Lucas C, Wong P, Klein J, et al. Longitudinal analyses reveal immunological misfiring in

- 382 severe COVID-19. *Nature*. 2020;584(7821):463-469. doi:10.1038/s41586-020-2588-y
- 383 12. Liang Y, Ge Y, Sun J. IL-33 in COVID-19: friend or foe? *Cell Mol Immunol*.  
384 2021;18(6):1602-1604. doi:10.1038/s41423-021-00685-w
- 385 13. Thibodeaux Q, Smith MP, Ly K, Beck K, Liao W, Bhutani T. A review of dupilumab in the  
386 treatment of atopic diseases. *Hum Vaccines Immunother*. 2019;15(9):2129-2139.  
387 doi:10.1080/21645515.2019.1582403
- 388 14. Wenzel S, Castro M, Corren J, et al. Dupilumab efficacy and safety in adults with  
389 uncontrolled persistent asthma despite use of medium-to-high-dose inhaled  
390 corticosteroids plus a long-acting  $\beta$ 2 agonist: a randomised double-blind placebo-  
391 controlled pivotal phase 2b dose-ranging trial. *Lancet*. 2016;388(10039):31-44.  
392 doi:10.1016/S0140-6736(16)30307-5
- 393 15. Blauvelt A, de Bruin-Weller M, Gooderham M, et al. Long-term management of moderate-  
394 to-severe atopic dermatitis with dupilumab and concomitant topical corticosteroids  
395 (LIBERTY AD CHRONOS): a 1-year, randomised, double-blinded, placebo-controlled,  
396 phase 3 trial. *Lancet*. 2017;389(10086):2287-2303. doi:10.1016/S0140-6736(17)31191-1
- 397 16. Geng B, Bachert C, Busse WW, et al. Respiratory Infections and Anti-Infective  
398 Medication Use From Phase 3 Dupilumab Respiratory Studies. *J Allergy Clin Immunol*  
399 *Pract*. 2022;10(3):732-741. doi:10.1016/j.jaip.2021.12.006
- 400 17. Ungar B, Glickman JW, Golant AK, et al. COVID-19 Symptoms Are Attenuated in  
401 Moderate-to-Severe Atopic Dermatitis Patients Treated with Dupilumab. *J Allergy Clin*  
402 *Immunol Pract*. 2022;10(1):134-142. doi:10.1016/j.jaip.2021.10.050
- 403 18. Mahroum N, Damiani G, Watad A, et al. Higher rates of COVID-19 but less severe  
404 infections reported for patients on Dupilumab: a Big Data analysis of the World Health  
405 Organization VigiBase. *Eur Rev Med Pharmacol Sci*. 2021;25(18):5865-5870.  
406 doi:10.26355/eurrev\_202109\_26808
- 407 19. National Institutes of Health (NIH). Coronavirus Disease 2019 (COVID-19) Treatment

- 408 Guidelines. 2020;2019:130. <https://covid19treatmentguidelines.nih.gov>
- 409 20. Food and Drug Administration (FDA). Dupixent package insert. Published online 2020.  
410 [https://www.accessdata.fda.gov/drugsatfda\\_docs/label/2019/761055s014lbl.pdf](https://www.accessdata.fda.gov/drugsatfda_docs/label/2019/761055s014lbl.pdf)
- 411 21. Shan D, Johnson JM, Fernandes SC, et al. N-protein presents early in blood, dried blood  
412 and saliva during asymptomatic and symptomatic SARS-CoV-2 infection. *Nat Commun*.  
413 2021;12(1):1931. doi:10.1038/s41467-021-22072-9
- 414 22. World Health Organization (WHO). Tracking SARS-CoV-2 variants.  
415 <https://www.who.int/en/activities/tracking-SARS-CoV-2-variants/>
- 416 23. Baker DJ, Aydin A, Le-Viet T, et al. CoronaHiT: high-throughput sequencing of SARS-  
417 CoV-2 genomes. *Genome Med*. 2021;13(1):21. doi:10.1186/s13073-021-00839-5
- 418 24. Williamson EJ, Walker AJ, Bhaskaran K, et al. Factors associated with COVID-19-related  
419 death using OpenSAFELY. *Nature*. 2020;584(7821):430-436. doi:10.1038/s41586-020-  
420 2521-4
- 421 25. Centers for Disease Control and Prevention (CDC). Rates of laboratory-confirmed  
422 COVID-19 hospitalizations by vaccination status. [https://covid.cdc.gov/covid-data-](https://covid.cdc.gov/covid-data-tracker/#covidnet-hospitalizations-vaccination)  
423 [tracker/#covidnet-hospitalizations-vaccination](https://covid.cdc.gov/covid-data-tracker/#covidnet-hospitalizations-vaccination)
- 424 26. Center for Disease Control and Prevention (CDC). In-hospital Mortality Among Hospital  
425 Confirmed COVID-19 Encounters by Week From Selected Hospitals.  
426 <https://www.cdc.gov/nchs/covid19/nhcs/hospital-mortality-by-week.htm>
- 427 27. Lundgren JD, Grund B, Barkauskas CE, et al. Responses to a Neutralizing Monoclonal  
428 Antibody for Hospitalized Patients With COVID-19 According to Baseline Antibody and  
429 Antigen Levels. *Ann Intern Med*. 2022;175(2):234-243. doi:10.7326/M21-3507
- 430 28. Phetsouphanh C, Darley DR, Wilson DB, et al. Immunological dysfunction persists for 8  
431 months following initial mild-to-moderate SARS-CoV-2 infection. *Nat Immunol*. Published  
432 online 2022. doi:10.1038/s41590-021-01113-x
- 433 29. Mainous AG, Rooks BJ, Wu V, Orlando FA. COVID-19 Post-acute Sequelae Among

- 434 Adults: 12 Month Mortality Risk. *Front Med*. 2021;8. doi:10.3389/fmed.2021.778434
- 435 30. Rabe KF, Nair P, Brusselle G, et al. Efficacy and Safety of Dupilumab in Glucocorticoid-  
436 Dependent Severe Asthma. *N Engl J Med*. 2018;378(26):2475-2485.  
437 doi:10.1056/NEJMoa1804093
- 438 31. Hamilton JD, Harel S, Swanson BN, et al. Dupilumab suppresses type 2 inflammatory  
439 biomarkers across multiple atopic, allergic diseases. *Clin Exp Allergy*. 2021;51(7):915-  
440 931. doi:10.1111/cea.13954
- 441 32. Deshmane SL, Kremlev S, Amini S, Sawaya BE. Monocyte Chemoattractant Protein-1  
442 (MCP-1): An Overview. *J Interf Cytokine Res*. 2009;29(6):313-326.  
443 doi:10.1089/jir.2008.0027
- 444 33. Chen Y, Wang J, Liu C, et al. IP-10 and MCP-1 as biomarkers associated with disease  
445 severity of COVID-19. *Mol Med*. 2020;26(1). doi:10.1186/s10020-020-00230-x
- 446 34. Morrison CB, Edwards CE, Shaffer KM, et al. SARS-CoV-2 infection of airway cells  
447 causes intense viral and cell shedding, two spreading mechanisms affected by IL-13.  
448 *Proc Natl Acad Sci*. 2022;119(16):1-12. doi:10.1073/pnas.2119680119  
449
